# Supplementary material for: 136 軟鋼材におけるプラズマアーク穴あけ加工の貫通特性(基礎解析(I),平成20年度秋季全国大会)
Source: publisher site journal article supplement (doi:10.18632/aging.205683), 2008-08-20
Supplement: Supplementary file [file aging-v16i7-205683-supplementary-material-SD1.pdf]

## SUPPLEMENTARY TABLES

**Supplementary Table 1. Information of GEO and TCGA datasets.**

| GSE number                   | Platform | Control | BC (DM) | Samples                |
|------------------------------|----------|---------|---------|------------------------|
| GSE42568                     | GPL570   | 17      | 104     | breast tissue          |
| GSE29221                     | GPL6947  | 12      | 12      | skeletal muscle tissue |
| GSE124646                    | GPL96    | 10      | 10      | breast tissue          |
| TCGA_GTE <sub>x</sub> (BRCA) | Illumina | 1099    | 292     | breast tissue          |

Abbreviations: BC: breast cancer; DM: diabetes mellitus.

**Supplementary Table 3. Primer and siRNA sequence.**

| Name                             | Sequence                |
|----------------------------------|-------------------------|
| DHCR7- Forward                   | CTCGGATCGGGAAGTGGTTTGAC |
| DHCR7- Reverse                   | GCCTTGCCTCCGTGTTCTCTTC  |
| GAPDH- Forward                   | CAGGAGGCATTGCTGATGAT    |
| GAPDH- Reverse                   | GAAGGCTGGGGCTCATT       |
| Negative Control siRNA sense     | UUCUCCGAACGUGUCACGUTT   |
| Negative Control siRNA antisense | ACGUGACACGUUCGGAGAATT   |
| DHCR7 siRNA1 sense               | CGGGAAGUGGUUUGACUUCAATT |
| DHCR7 siRNA1 antisense           | UUGAAGUCAAAACCACUCCCGTT |
| DHCR7 siRNA2 sense               | GCCUUAUCUUUACACGCUGCATT |
| DHCR7 siRNA2 antisense           | UGCAGCGUGUAAAGUAAGGCTT  |
