# Supplementary material for: Identification and validation of DHCR7 as a diagnostic biomarker involved in the proliferation and mitochondrial function of breast cancer
Source: Aging (Albany NY). 2024 Mar 22;16(7):5967–86. doi: 10.18632/aging.205683 (PMC11042931; doi:10.18632/aging.205683)
Supplement: Supplementary Table 2 [file aging-16-205683-s002.xlsx]

## Sheet: Sheet4
Supplementary Table 2. The list of DEGs and EMRGs.
BC DEGs ( 3249)	DM DEGs ( 2673)	EMRGs (592)
A2M-AS1	A4GALT	A4GNT
AADAC	AACS	AARS1
AAED1	AAED1	ABCA1
AAMDC	AAK1	ABCF1
AASS	AAR2	SDHAF3
ABCA1	ABCA8	ADCY7
ABCA5	ABCC12	ADK
ABCA6	ABCC5	ADM
ABCA8	ABCD1	ADORA2A
ABCA9	ABCG1	ADSS2
ABCC10	ABHD6	AGPAT1
ABCC3	ABHD8	AGPAT2
ABCC5	ABI1	GPAT4
ABCC6	ABI3BP	AGPS
ABCD2	ABL1	AIPL1
ABCG1	ABLIM1	AK5
ABHD11	ABTB1	AKR1D1
ABHD14B	ACADL	AKT1
ABHD15	ACADM	ALAD
ABHD17C	ACADVL	ALAS1
ABHD2	ACAT2	ALAS2
ABHD5	ACBD6	ALDH18A1
ABHD6	ACCS	ALDH9A1
ABI2	ACER3	ALG1
ABI3BP	ACLY	ALG12
ABLIM3	ACO1	ALG2
ABRACL	ACO2	ALG5
ACAA2	ACOT7	ALG6
ACACB	ACOT9	ALG8
ACADL	ACOX2	ALK
ACADM	ACP6	ANG
ACADS	ACSL3	AP3D1
ACAT1	ACSL5	APBB1
ACER3	ACTA1	APOA1
ACKR1	ACTG2	APOA2
ACKR3	ACTL6A	ARPP19
ACKR4	ACTN1	ASMT
ACO1	ACTN2	ASMTL
ACO2	ACTN4	ATF4
ACOT13	ACVRL1	ATG7
ACSL1	ADA	AZU1
ACSL4	ADAL	B3GALNT1
ACSL5	ADAM15	B3GALT2
ACSM5	ADAMTS1	B3GALT4
ACSS2	ADAMTSL4	B3GALT5
ACSS3	ADAP1	B3GALT6
ACTN4	ADCK2	B3GAT2
ACVR1C	ADCY1	B3GNT5
ACYP2	ADCY2	B3GNT8
ADAM1A	ADCY3	B4GALT1
ADAM8	ADD1	B4GALT7
ADAMTS1	ADGRA2	BACE2
ADAMTS18	ADGRE5	BBOX1
ADAMTS3	ADGRL2	BCAT1
ADAMTS5	ADH1B	BCL10
ADAMTS9	ADIPOR2	BCL3
ADAMTSL3	ADIRF	BMP6
ADAR	ADK	BOLL
ADD3	ADM	BRCA1
ADGRA2	ADM5	VPS9D1
ADGRD1	ADPGK	CD276
ADGRF5	ADPRHL1	CD28
ADGRG1	ADPRM	CD37
ADGRL2	ADRB2	CD74
ADGRL4	ADSS	CD81
ADH1A	AEBP1	CDO1
ADH1B	AEN	CEBPG
ADH1C	AFAP1	CHM
ADH5	AGAP3	CHPT1
ADHFE1	AGBL5	CHST11
ADI1	AGPAT2	CHST12
ADIPOQ	AGRN	CHST13
ADIRF	AHCY	CHST3
ADK	AHI1	CHST6
ADM	AHNAK	CHST7
ADNP	AHNAK2	CHST8
ADRA2A	AIMP2	CHST9
ADRB1	AIP	CMPK1
ADRB2	AK4	CNBP
ADSS	AKAP10	COASY
ADSSL1	AKAP11	COG2
AEBP1	AKAP12	COG3
AFAP1L1	AKAP13	COG7
AFDN	AKAP17A	COPS5
AFG3L1P	AKAP7	COQ2
AGAP1	AKR1A1	COQ3
AGAP4	AKR1B1	COQ7
AGPAT2	AKR1C2	COX10
AGPAT5	AKR1C4	COX15
AGPS	AKT1	CPOX
AGR2	ALAS1	CTPS1
AGR3	ALDH18A1	CYP11A1
AGRN	ALDH1A2	CYP11B2
AGTPBP1	ALDH2	CYP19A1
AGTR1	ALDH5A1	CYP27B1
AHCY	ALDH6A1	CYP39A1
AIF1	ALDH7A1	CYP7B1
AIFM2	ALDOC	CSGALNACT1
AJUBA	ALG13	DARS1
AK3	ALG14	DAZ1
AK4	ALG1L	DAZL
AK6	ALG8	DCT
AKAP10	ALG9	DDAH2
AKAP11	ALPK2	DDX25
AKAP12	AMER1	DEFB103A
AKAP7	AMOT	DEGS1
AKAP8L	AMPH	DGAT2
AKR1B1	ANG	DGKE
AKR1C1	ANGPT2	DHCR24
AKR1C2	ANGPTL2	DHCR7
AKR1C3	ANKRA2	DHPS
AKT3	ANKRD13D	DHRS9
ALAD	ANKRD46	DMD
ALCAM	ANKRD49	DOLPP1
ALDH18A1	ANKRD50	DPH1
ALDH1A1	ANKRD54	DPH3
ALDH1L1	ANP32B	DPM1
ALDH2	ANTXR1	DPM2
ALDH3A2	ANTXR2	DPM3
ALDH3B2	ANXA1	DYRK2
ALDH5A1	ANXA2	EBI3
ALDH6A1	ANXA2P1	EEF1A1
ALDOC	AP1B1	EEF2K
ALG9	AP1M1	EGFR
ALKAL2	AP2B1	EIF1
ALPK3	AP2M1	EIF1AX
AMMECR1	AP3S1	EIF1B
AMOTL2	APBB1IP	EIF2A
ANAPC10	APCDD1	EIF2AK1
ANG	APEH	EIF2AK3
ANGPT1	APH1A	EIF2AK4
ANGPTL1	APH1B	EIF2B1
ANGPTL2	APLNR	EIF2B2
ANGPTL4	APLP2	EIF2B3
ANGPTL8	APOC1	EIF2B4
ANK2	APOE	EIF2B5
ANK3	APOO	AGO1
ANKHD1	APOOL	EIF2S3
ANKRD10	APP	EIF3A
ANKRD10-IT1	APPL2	EIF3B
ANKRD13D	AQP1	EIF3C
ANKRD29	AQP6	EIF3D
ANKRD30A	AR	EIF3E
ANKRD30B	ARAP2	EIF3F
ANKRD33B	ARF3	EIF3G
ANKRD35	ARFGAP3	EIF3H
ANKRD36	ARHGAP1	EIF3I
ANKRD36B	ARHGAP15	EIF3J
ANKRD40	ARHGAP33	EIF4A2
ANKRD46	ARHGAP44	EIF4A3
ANKRD50	ARHGDIA	EIF4B
ANKZF1	ARHGDIB	EIF4G2
ANLN	ARHGEF10	EIF4G3
ANO1	ARHGEF12	EIF4H
ANO3	ARHGEF18	EIF5
ANO6	ARHGEF40	EIF5A
ANTXR2	ARID3B	ELANE
ANXA1	ARID4B	EREG
ANXA5	ARL17A	ETF1
ANXA6	ARL2BP	ETNK1
ANXA9	ARL6IP1	EXT1
AOC3	ARL6IP6	EXT2
AOX1	ARMC10	FADS1
AP1G2	ARMC7	FADS2
AP1M2	ARMCX1	FARS2
AP1S2	ARMCX3	FARSB
AP1S3	ARRB1	FDPS
AP2B1	ARSD	FDXR
AP3D1	ART3	FECH
APBB1IP	ASAP1	FNTA
APCDD1	ASAP2	FNTB
APEX2	ASIC3	FOXP3
APH1A	ASMTL	FURIN
APIP	ASNS	FUT1
APOB	ASNSD1	FUT10
APOBEC3B	ATF2	FUT2
APOD	ATF3	FUT4
APOL6	ATF6	FUT5
APOLD1	ATG10	FUT6
APP	ATG2A	FUT7
APTX	ATG4A	FUT8
AQP1	ATG4C	FUT9
AQP3	ATM	GAL3ST1
ARF1	ATN1	CHST15
ARF3	ATOH8	CSGALNACT2
ARFGAP1	ATP11B	GALNT1
ARFGEF1	ATP1A1	GALNT2
ARFGEF3	ATP1A2	GALNT5
ARFIP2	ATP1B1	GALNT6
ARHGAP21	ATP1B2	GALNT7
ARHGAP24	ATP23	GAMT
ARHGAP28	ATP2A2	GATM
ARHGAP31	ATP2B2	GBGT1
ARHGAP32	ATP2B4	GCH1
ARHGAP39	ATP5A1	GCHFR
ARHGAP42	ATP5B	GCK
ARHGAP5	ATP5EP2	GCLC
ARHGAP6	ATP5F1	GCLM
ARHGEF28	ATP5G1	GCNT1
ARHGEF4	ATP5G2	GCNT2
ARHGEF40	ATP5H	GCNT3
ARHGEF6	ATP5I	GCNT4
ARID5B	ATP5J	MOGS
ARL2	ATP5J2	GHRL
ARMC9	ATP5L	GHSR
ARMCX1	ATP5O	GLA
ARNT2	ATP6AP2	GLCE
ARRDC1	ATP6V0E1	GLMN
ARRDC3	ATP6V0E2	GMDS
ARRDC4	ATP6V1G2	GMPS
ARSD	ATPAF1	GPAA1
ASAH1	ATPAF2	GPR143
ASB13	ATPIF1	GRM8
ASCL2	ATXN3	GUK1
ASNS	ATXN7L2	GYG2
ASPA	ATXN7L3	GYPC
ASPH	AUTS2	GYS2
ASPM	B3GALT6	HAS1
ASS1	B4GALT5	HBS1L
ATAD2	B4GAT1	HPGD
ATAD2B	BAALC	HPRT1
ATAD3A	BAD	RIDA
ATF3	BAG3	HS3ST3B1
ATG16L1	BAG5	HS3ST5
ATL3	BANF1	HS6ST1
ATOH8	BASP1	HSD11B2
ATP13A1	BAX	HSD3B1
ATP13A2	BAZ2B	HSD3B7
ATP1A1	BCAP29	HSP90AA1
ATP1A2	BCAP31	HSP90AB1
ATP1B1	BCAR1	HSPB1
ATP23	BCAS4	IDI1
ATP2A2	BCDIN3D	IGF2BP2
ATP2A3	BCKDHB	IL10
ATP2C2	BCKDK	IL12B
ATP5MD	BCL2L2	IL17A
ATP5PO	BCL3	IL17F
ATP5S	BCL7B	IL18
ATP6AP1	BEX3	IL27
ATP6V0B	BGLAP	IFNL1
ATP6V0E2-AS1	BGN	IL4
ATP8B4	BHLHE40	IL6
ATPAF1	BMP1	IL9
AUH	BNIP3L	IMPA1
AUNIP	BOLA3	INHA
AURKA	BORCS6	INHBA
AUTS2	BORCS7	INHBB
AVEN	BRAF	IRF4
AVPI1	BRAT1	KARS1
AVPR1A	BRCC3	KEL
AXL	BRD7	KRT7
AZI2	BRD9	LALBA
B3GALNT1	BRE	LARGE1
B3GALT5	BRI3	CERS1
B3GALT6	BRK1	CERS5
B3GAT3	BRMS1	LCAT
B4GALNT3	BTBD6	LDLR
B4GALT3	BTF3L4	LIPA
B4GALT6	BTG1	LIPC
BAIAP2	BTG2	LPCAT1
BAIAP2-DT	BTG3	LRP2
BAIAP2L1	BTN2A1	LTA4H
BAMBI	BUB3	LTB
BANF1	BUD31	MAGT1
BARD1	BVES	MAN1A2
BCAR3	BZW2	MAN1C1
BCAS1	C10orf10	MARS2
BCAS4	C11orf57	MAST2
BCAT1	C11orf74	MAT2B
BCHE	C12orf43	MCAT
BCKDHB	C12orf76	ME1
BCL11A	C14orf159	METAP1
BCL11B	C14orf180	MGAT4A
BCL2	C14orf93	MGAT4B
BCL2L1	C16orf58	MIF
BCL2L13	C17orf62	MOCS2
BCL2L2	C18orf25	MPDU1
BCL6	C18orf8	MRPL10
BCOR	C19orf12	MRPL23
BEX2	C19orf18	MRPL3
BGN	C19orf24	MRPL41
BHLHE40	C19orf25	MRPL51
BHLHE41	C19orf54	MRPL52
BHMT2	C19orf66	MRPL55
BICC1	C19orf70	MRPS24
BICD1	C1orf109	MRPS7
BICDL1	C1orf115	MTIF2
BICDL2	C1orf122	MTIF3
BIK	C1orf43	MTRF1
BIN1	C1orf53	MVK
BIRC5	C1orf54	NACA
BLM	C1QTNF1	NANP
BLNK	C1QTNF5	NDST1
BMP2	C1S	NDUFA13
BMPER	C20orf27	NECAB3
BMPR1B	C21orf2	NFE2L1
BMS1P2	C2CD2	NLRP12
BNIP2	C2orf40	NOD1
BNIP3	C2orf68	NOS2P1
BNIP3L	C3	NPC1L1
BOC	C3orf38	NQO1
BOK	C3orf70	NR0B1
BORCS7	C4orf3	NR5A1
BPHL	C5	NSDHL
BRD2	C5orf15	OAZ1
BRI3	C5orf34	OCA2
BRIP1	C5orf51	OGT
BRMS1	C6orf48	OXER1
BRWD1	C7orf26	OXSM
BSPRY	C8orf82	PABPC4
BST1	C9orf16	PAH
BST2	C9orf66	PAICS
BTBD6	C9orf78	PAIP1
BTD	CA2	PAIP2
BTF3L4	CA3	PAIP2B
BTN2A2	CABLES1	PCYT1B
BTNL9	CACNA1B	PCYT2
BUB1B	CACNA1H	PDSS1
BUB3	CACNB3	PDSS2
BZW2	CADM3	PDZD3
C11orf74	CALB2	PEMT
C11orf80	CALD1	GATB
C11orf96	CALR	PEX7
C12orf49	CAMK1	PFKFB1
C14orf180	CAMK1D	PGGT1B
C15orf40	CAMK2B	PGS1
C15orf48	CAMK2N1	PI4K2A
C16orf54	CANT1	PI4KA
C19orf12	CANX	PI4KB
C19orf33	CAP1	PIGA
C1GALT1C1L	CAP2	PIGB
C1orf115	CAPN3	PIGC
C1orf116	CAPRIN1	PIGF
C1orf123	CARD10	PIGG
C1orf35	CARHSP1	PIGH
C1orf56	CASC4	PIGK
C1QA	CASQ1	PIGO
C1QC	CASQ2	PIGS
C1QTNF1	CASZ1	PIGT
C1QTNF2	CAV1	PIGU
C1QTNF7	CBFB	PIGV
C1S	CBR3	PIGY
C22orf39	CBX1	PIGZ
C2CD2	CBX4	PIK3C2A
C2CD3	CBX6	PLCE1
C2orf40	CBY1	PLOD1
C2orf76	CC2D2A	PMM2
C3	CCDC102A	PNPLA3
C3orf14	CCDC112	POFUT1
C3orf52	CCDC115	POMGNT1
C4orf19	CCDC130	POMT1
C4orf3	CCDC140	PPARGC1A
C5AR1	CCDC146	PPAT
C5orf46	CCDC28A	PPOX
C6	CCDC28B	PRG3
C6orf120	CCDC3	PTGDS
C6orf132	CCDC34	PTGES3
C6orf141	CCDC50	PTGS1
C7	CCDC69	PTPRC
C8orf34	CCDC85A	PTS
C8orf88	CCDC88A	PYCR1
C9orf152	CCDC89	RARS1
C9orf24	CCDC92	RPL11
CA12	CCL19	RPL13
CA3	CCL23	RPL14
CA4	CCL5	RPL15
CABLES2	CCNC	RPL18
CABYR	CCND2	RPL18A
CACHD1	CCND3	RPL19
CACNA1D	CCNI	RPL21
CACNA2D1	CCNYL1	RPL22
CACNA2D2	CCT6B	RPL23A
CACNB3	CCT7	RPL24
CAD	CCZ1B	RPL26
CADM4	CD151	RPL27A
CALB2	CD2	RPL28
CALCRL	CD24	RPL29
CALM1	CD247	RPL3
CALML5	CD276	RPL30
CAMK1	CD302	RPL31
CAMK2N1	CD320	RPL34
CANT1	CD34	RPL35
CAPG	CD3D	RPL37
CAPN1	CD44	RPL38
CAPN13	CD47	RPL39
CAPN8	CD52	RPL3L
CAPS	CD58	RPL4
CAPZA2	CD81	RPL41
CARD10	CD9	RPL5
CARD16	CD93	RPL6
CARD6	CD99	RPL7
CASP1	CDC123	RPL7A
CASP2	CDC14B	RPL8
CASP4	CDC25B	RPL9
CASQ2	CDC42	RPN1
CAST	CDC42EP4	RPS10
CASZ1	CDC42EP5	RPS11
CAT	CDC42SE1	RPS12
CAV1	CDCA4	RPS17
CAV2	CDCA7	RPS19
CAVIN1	CDIP1	RPS2
CAVIN2	CDK13	RPS27
CAVIN3	CDK19	RPS3
CBFA2T2	CDK2	RPS3A
CBS	CDK4	RPS4Y1
CBX2	CDK5RAP2	RPS5
CBX4	CDK6	RPS6KB2
CBX5	CDK9	RPS9
CC2D2A	CDKN1C	RRBP1
CCBE1	CDKN2C	SAMD4A
CCDC125	CDKN2D	SARS2
CCDC137	CDO1	SCP2
CCDC14	CDR2	AIMP1
CCDC141	CDR2L	SDF2
CCDC167	CEBPA	SEPSECS
CCDC178	CENPB	SERP1
CCDC18-AS1	CENPN	SFTPD
CCDC24	CENPP	SGMS1
CCDC28A	CEP131	SGMS2
CCDC3	CEP135	SIGIRR
CCDC50	CEP44	SLC25A10
CCDC69	CEP63	SLC5A7
CCDC71L	CEP85	SOD1
CCDC80	CEPT1	SPN
CCDC82	CERCAM	SPR
CCDC85C	CERS5	ST6GALNAC6
CCDC88C	CERS6	ST8SIA1
CCDC9B	CES2	ST8SIA2
CCL13	CETN3	ST8SIA3
CCL2	CETP	ST8SIA4
CCL8	CFAP20	ST8SIA5
CCM2L	CFAP61	STT3A
CCNA2	CFAP69	STT3B
CCNB1	CFB	SULT1A2
CCNB2	CFH	TFCP2L1
CCND2	CFL1	TGFB2
CCNDBP1	CGNL1	TLR1
CCNE2	CHAF1B	TLR3
CCNF	CHCHD3	TLR4
CCNG1	CHCHD4	TLR6
CCNH	CHIC2	TLR7
CCNL2	CHMP2B	TLR8
CCR5	CHMP3	TLR9
CCSER2	CHMP4A	TM4SF4
CCT3	CHMP5	TM4SF5
CD14	CHN1	TNFRSF8
CD163	CHPF	TNIP1
CD164	CHPT1	TRAK1
CD2	CHST12	TRNAU1AP
CD200	CHST14	TSC1
CD209	CHST15	TSFM
CD24	CHST7	TSPAN7
CD248	CHSY1	TSPAN8
CD34	CIAO1	TSPO
CD36	CIART	GFUS
CD47	CIC	TUFM
CD58	CIDECP	TUSC3
CD69	CIPC	TYMS
CD9	CISD1	TYR
CD99L2	CKB	UAP1
CDC14B	CKLF	UCN2
CDC20	CKMT2	UGCG
CDC25B	CKS1B	UGDH
CDC26	CKS2	UMPS
CDC37L1	CLCN7	UPF1
CDC42EP2	CLDN12	UROS
CDC7	CLDN15	WARS1
CDCA3	CLDN23	XYLT1
CDCA4	CLEC11A	YARS1
CDCA5	CLEC14A	YBX2
CDCA7	CLEC1A	PRKAR2B
CDCA8	CLEC2D	ABCC8
CDCP1	CLEC3B	ADIPOR2
CDH1	CLIC1	CACNA2D2
CDH11	CLIC5	MLXIPL
CDH3	CLIC6	GNA15
CDH5	CLINT1	ACSL4
CDK1	CLIP3	GNB5
CDK5RAP3	CLK1	PRKACA
CDKN1C	CLN5	ACACB
CDKN2B	CLP1	ADCY2
CDKN2C	CLPTM1	GNB1
CDKN3	CLSTN1	RAPGEF3
CDO1	CLTA	GNAS
CDON	CLTCL1	GNA11
CDS1	CLUAP1	RAPGEF4
CDT1	CMAS	ITPR3
CEACAM1	CMIP	PPP2CB
CEACAM5	CMTM3	PPP2R1A
CEACAM6	CMTM7	STX1A
CEBPA	CMTR2	PRKAG2
CEBPD	CNIH1	MLX
CELF2	CNKSR3	PRKAR1A
CELSR1	CNN3	GNB3
CELSR2	CNOT10	GLP1R
CELSR3	CNOT2	PPP2R5D
CENPF	CNOT3	PPP2CA
CENPK	CNRIP1	PRKAR2A
CENPM	COBLL1	GNAI2
CENPU	COL12A1	GNB4
CENPW	COL14A1	GCG
CENPX	COL15A1	RAP1A
CEP112	COL16A1	SLC2A1
CEP126	COL18A1	STK11
CEP164	COL1A1	ADCY7
CEP41	COL3A1	ITPR2
CEP55	COL4A2	ACSL3
CEP63	COL4A3BP	FFAR1
CEP68	COL5A1	GNG13
CEP85	COL6A1	GNG11
CERS2	COL6A2	GNGT1
CERS4	COL6A3	GNAI1
CERS6	COL7A1	ADCY4
CES1	COL8A1	SYT5
CFAP300	COL8A2	ACLY
CFAP44	COLEC12	PRKAB2
CFB	COLGALT1	SNAP25
CFD	COLGALT2	CHRM3
CFH	COMMD10	CD36
CFL2	COMMD2	STXBP1
CGN	COMMD6	PPP2R1B
CGNL1	COMMD8	PLCB2
CGRRF1	COPS4	ADCY3
CH25H	COPS7B	IQGAP1
CHCHD10	COPS8	CACNA1A
CHD3	COQ10B	PRKACB
CHD6	COQ3	PKLR
CHD7	COQ6	PLCB3
CHDH	COQ8A	ADRA2A
CHEK1	COQ9	ITPR1
CHKA	CORO1B	CACNA1C
CHL1	CORO1C	CYSLTR2
CHML	CORO2A	PRKCA
CHMP2B	CORO6	ADCY8
CHMP4C	COX4I1	GNA14
CHP1	COX4I2	GNAQ
CHPF2	COX5A	CACNA1D
CHRDL1	COX5B	KCNB1
CHST11	COX6A1	PFKFB1
CHST15	COX7C	ADIPOR1
CHST7	COX8A	ADCY9
CHTF18	CPD	GNG3
CHTOP	CPEB3	PRKAA2
CHURC1	CPNE3	SLC2A2
CIB2	CPT1B	TKT
CIDEA	CPXM2	ADCY1
CIDEC	CREB3L2	PRKACG
CILP	CREB5	CACNB2
CITED2	CREBRF	KCNC2
CKAP2	CRIM1	GNGT2
CKAP4	CRIP1	GNG8
CKB	CRIP2	CACNB3
CKMT2	CRISPLD2	GNG4
CKS2	CRKL	AHCYL1
CLBA1	CRTAP	FASN
CLCN4	CRYAB	KCNS3
CLDN11	CS	GNB2
CLDN3	CSE1L	GNG12
CLDN4	CSNK1A1	ADCY5
CLDN5	CSNK2A2	GNG5
CLDN7	CSPG4	ADCY6
CLEC10A	CSRNP1	GNG7
CLEC2B	CSRP1	TALDO1
CLEC7A	CST9	KCNG2
CLGN	CSTF2T	AKAP5
CLIC2	CTBS	ADIPOQ
CLIP4	CTF1	PLCB1
CLK2	CTIF	ADRA2C
CLMN	CTNNBIP1	GNG2
CLMP	CTNNBL1	KCNJ11
CLSTN1	CTSB	PRKAR1B
CLSTN2	CTSC	CACNA1E
CLU	CTSK	AGPAT1
CLUHP3	CTSL	AGPAT1
CLYBL	CTSZ	VAMP2
CMA1	CTTN	AGPAT1
CMC4	CUL5	AGPAT1
CMPK2	CUTC	AGPAT1
CMTM4	CWF19L1	AGPAT1
CMYA5	CWF19L2	AGPAT1
CNKSR1	CXCL12	GNG10
CNNM4	CXCL14	INS
CNOT11	CXCR4	PKLR
CNPY3	CXCR5	ACACA
CNRIP1	CXorf57	MARCKS
CNTFR-AS1	CYB561	ACACA
CNTN3	CYB561D2	GNG4
CNTNAP2	CYB5A	PRKAR2B
COBL	CYB5D2	ADCY4
COBLL1	CYB5R1	ADIPOR2
COL10A1	CYB5R3	CACNA1C
COL11A1	CYBA	PRKACA
COL13A1	CYBRD1
COL15A1	CYC1
COL16A1	CYFIP1
COL1A1	CYP20A1
COL27A1	CYP2E1
COL4A1	CYP2U1
COL4A3BP	CYP4X1
COL4A5	CYTH3
COL5A1	D2HGDH
COL5A2	DAAM1
COL5A3	DACT3
COL6A6	DAGLA
COL7A1	DAZAP2
COL8A2	DBI
COLEC11	DBN1
COLEC12	DBNL
COMMD5	DCAF16
COMMD6	DCAF5
COMP	DCAF6
COPG2	DCAF7
COPS2	DCAKD
COPS4	DCK
COPZ2	DCLK1
COQ8A	DCN
CORO1B	DCTN3
CORO1C	DCTN5
CORO2A	DCTN6
CORO2B	DDAH2
COX14	DDIT4L
COX7A1	DDR1
CPA3	DDR2
CPE	DDX17
CPEB1	DDX5
CPED1	DDX54
CPM	DDX55
CPNE2	DEAF1
CPS1	DEGS1
CPVL	DENND2C
CPXM1	DENND5A
CPXM2	DERA
CR1	DES
CRABP2	DFFA
CRACR2A	DGAT1
CRACR2B	DGCR8
CRADD	DGUOK
CRB3	DHCR7
CRBN	DHDDS
CREB3L4	DHFR2
CREB5	DHPS
CREBL2	DHRS1
CREBZF	DHRS12
CREG1	DHRS7
CRIM1	DHX33
CRIP2	DHX38
CRIPAK	DHX40
CRK	DICER1
CRLS1	DIMT1
CRNDE	DIO2
CRTAP	DIRAS3
CRY2	DKFZP564C152
CRYAB	DKK3
CRYBG3	DLAT
CRYL1	DLC1
CRYZL1	DMAP1
CS	DMD
CSF1R	DNAJA3
CSGALNACT1	DNAJB11
CSK	DNAJB12
CSN1S1	DNAJB2
CSNK1D	DNAJB5
CSRNP1	DNAJC12
CSRP2	DNAJC15
CST3	DNAJC24
CST6	DNAJC25
CSTA	DNAJC7
CSTF3	DNAL4
CTBP2	DNALI1
CTH	DNASE2
CTHRC1	DNTTIP1
CTIF	DOCK1
CTNNAL1	DOCK10
CTPS1	DOCK7
CTPS2	DOK4
CTSD	DOLK
CTSG	DPP7
CTTN	DPT
CTTNBP2	DPY19L4
CUTC	DPYSL2
CXADR	DRAM1
CXCL10	DRAP1
CXCL11	DSE
CXCL12	DSTN
CXCL14	DSTYK
CXCL2	DTNA
CXCL9	DTWD1
CXCR4	DUSP12
CXorf40B	DUSP13
CYB561	DUSP14
CYB5A	DUSP18
CYB5D2	DUSP22
CYB5R3	DUSP23
CYBRD1	DUSP26
CYFIP2	DUSP3
CYGB	DUT
CYP26B1	DVL2
CYP2B7P	DYNC1LI2
CYP2R1	DYNC2H1
CYP2U1	DYNC2LI1
CYP4B1	DYSF
CYP4Z1	E4F1
CYP4Z2P	EBAG9
CYR61	EBF1
CYS1	EBF2
CYSTM1	EBF3
CYYR1	ECH1
D2HGDH	ECI2
DAAM2	ECM1
DAB2	ECM2
DACH1	ECSCR
DAGLB	ECSIT
DANCR	EDN1
DAPK2	EDNRA
DBF4	EEF1A1
DBP	EEF1B2
DCAF13	EEF2K
DCAF7	EEPD1
DCAF8	EFEMP1
DCBLD1	EFEMP2
DCN	EFHD1
DCTN6	EFHD2
DCTPP1	EFNA1
DCUN1D2	EFNB2
DCUN1D3	EGFLAM
DCUN1D4	EHBP1
DDAH1	EIF2AK1
DDHD2	EIF2B1
DDIT4L	EIF3M
DDR2	EIF4B
DDX11	EIF4EBP2
DDX31	ELAVL1
DDX39A	ELK1
DDX56	ELL2
DECR1	ELOVL1
DEF6	ELP5
DEFB1	EMC6
DEFB132	EMC7
DEGS2	EMCN
DENND1B	EMILIN2
DENND2A	EML3
DENND5B	EMP3
DEPDC1	ENC1
DEPP1	ENG
DGAT1	ENKD1
DGAT2	ENO1
DGCR2	ENO2
DGKD	ENO3
DGKE	ENOX2
DGKH	ENPP1
DGKQ	ENPP2
DHCR24	ENSA
DHCR7	ENTPD1
DHDDS	EOGT
DHRS11	EP400
DHRS12	EPAS1
DHRS13	EPB41L2
DHRS3	EPB41L4A-AS2
DHRS7B	EPHB4
DHRS9	EPM2A
DHX33	EPS15
DIAPH1	ERBB2
DIAPH2	ERC1
DIP2C	ERCC1
DIS3L	ERH
DIXDC1	ERICH1
DKFZP586I1420	ERRFI1
DKFZp779M0652	ESYT2
DKK3	ETFDH
DLAT	EVL
DLC1	EWSR1
DLD	EXD3
DLEU2	EXOC2
DLG3	EXOC6
DLG5	EXOC7
DLGAP5	EXOSC2
DMD	EXT1
DMGDH	EXT2
DMKN	EXTL2
DMRT2	EYA4
DMTN	EZR
DNAAF5	F8
DNAH5	F8A1
DNAJB4	FAAP20
DNAJC1	FADD
DNAJC12	FADS1
DNAJC15	FAH
DNAJC9	FAIM
DNASE1L3	FAM107B
DNMT1	FAM109A
DNMT3A	FAM110D
DNMT3B	FAM111A
DOCK11	FAM114A1
DOCK5	FAM120AOS
DOCK6	FAM120B
DOK7	FAM122A
DPCD	FAM122B
DPH3	FAM126B
DPP3	FAM127B
DPP4	FAM129B
DPT	FAM131A
DPYD	FAM134A
DPYSL2	FAM13A
DRAM2	FAM149A
DSE	FAM162B
DSEL	FAM172A
DSG2	FAM173B
DSP	FAM177A1
DTD2	FAM184A
DTL	FAM188B
DTX1	FAM20C
DTX3	FAM213A
DTX3L	FAM214A
DTYMK	FAM214B
DUSP1	FAM219A
DUSP14	FAM222B
DUSP16	FAM3A
DUSP5	FAM46A
DUSP6	FAM46C
DUXAP10	FAM50A
E2F3	FAM50B
E2F7	FAM53C
E2F8	FAM78B
E4F1	FAM84B
EBF1	FAM96A
EBF2	FAR1
EBF3	FASN
EBLN2	FASTKD2
EBPL	FAXDC2
ECE2	FBLN1
ECH1	FBLN2
ECHDC1	FBLN5
ECHDC3	FBXO11
ECHS1	FBXO21
ECI2	FBXO33
ECM2	FBXO4
ECSCR	FBXO8
ECT2	FBXW11
EDNRB	FBXW2
EEA1	FBXW7
EEPD1	FCGRT
EFEMP1	FER
EFEMP2	FERMT2
EFHD1	FES
EFNA1	FEZ1
EFNA4	FGD5
EGFL6	FGGY
EGFLAM	FGL2
EGFR	FHOD3
EGLN3	FIGNL1
EGOT	FIZ1
EGR1	FKBP14
EGR2	FKBP1A
EGR3	FKBP3
EHBP1	FLJ20021
EHD2	FLNB
EHF	FLT3LG
EHHADH	FMOD
EHMT2	FNTA
EIF1AD	FOXC1
EIF1B	FOXD4
EIF2AK1	FOXJ2
EIF2AK3	FRAT2
EIF2B3	FRMD3
EIF2B5	FRMD4A
EIF3C	FRMD6
EIF4E3	FRMPD1
EIF4EBP2	FSCN1
ELAC1	FST
ELAVL2	FSTL1
ELF3	FSTL3
ELF4	FTH1
ELL2	FTH1P3
ELL3	FTL
ELMO3	FTSJ1
ELMOD3	FUCA1
ELOVL5	FUCA2
EMC3	FURIN
EMC3-AS1	FUT4
EMCN	FUZ
EME1	FXN
EME2	FXR1
EMILIN2	FXYD5
EML1	FYN
EMP1	FZD4
EMP2	G6PD
EMP3	GAA
EMX2	GABRE
EMX2OS	GAK
ENAH	GALC
ENC1	GALNT16
ENO2	GAMT
ENPEP	GANAB
ENPP2	GAPDH
ENPP4	GAS1
ENPP5	GAS7
ENTPD6	GBA
EOGT	GBAS
EP300-AS1	GBE1
EP400	GBP2
EPAS1	GCA
EPB41L1	GCC1
EPB41L2	GDI2
EPB41L3	GEMIN8
EPB41L4A-AS1	GFOD2
EPB41L4B	GFPT2
EPB41L5	GFRA2
EPB42	GFRA4
EPCAM	GGPS1
EPDR1	GHDC
EPHA3	GHITM
EPHB3	GID8
EPHB4	GIMAP5
EPHX1	GIMAP7
EPM2A	GIMAP8
EPN3	GIN1
EPPK1	GINS3
EPS15	GJD3
EPS8	GK5
EPS8L1	GLA
EPS8L2	GLB1
ERAP1	GLG1
ERBB2	GLI3
ERBB3	GLIPR2
ERBB4	GLMP
ERCC8	GLRX3
ERG28	GLTP
ERGIC1	GLTSCR2
ERMP1	GLUD1
ERN1	GMCL1
ERP27	GMDS
ESD	GMEB2
ESPL1	GMFB
ESRP1	GNAQ
ESYT1	GNB1
ETFA	GNB2
ETFB	GNG10
ETFDH	GNG11
ETFRF1	GNG12
ETNK1	GNRH1
ETV6	GOLGA3
EVI5	GOLGA7
EVL	GOLGA8B
EXOC6B	GOLIM4
EXOC7	GOLPH3
EXOSC4	GOLPH3L
EZH1	GOT1
EZH2	GOT2
EZR	GPAM
F10	GPAT2
F11R	GPAT3
F12	GPC3
F13A1	GPD1L
F2RL1	GPIHBP1
F2RL2	GPM6B
F3	GPNMB
F8	GPR108
FAAH	GPR162
FAAH2	GPX1
FABP4	GPX3
FABP5	GPX4
FADD	GRAMD4
FADS3	GRB10
FAH	GRINA
FAM102A	GRK5
FAM107A	GRN
FAM110A	GRPEL1
FAM110C	GSKIP
FAM111A	GSR
FAM111A-DT	GSTM1
FAM126A	GSTM2
FAM129B	GSTM5
FAM13A	GSTO2
FAM13A-AS1	GTF2B
FAM13C	GTF2E2
FAM149A	GTF2F1
FAM160A2	GTPBP3
FAM162B	GUCY1A3
FAM171A1	GUCY1B3
FAM172A	GUF1
FAM173A	GUSB
FAM174B	GUSBP2
FAM185A	GYG2
FAM200B	GYPC
FAM208B	GYS1
FAM213A	GZMH
FAM213B	H1FX
FAM228A	H3F3A
FAM228B	HABP4
FAM234B	HACD1
FAM241B	HACD3
FAM43A	HADHA
FAM46C	HADHB
FAM49A	HARS2
FAM69A	HAUS4
FAM76A	HBEGF
FAM83B	HBP1
FAM83D	HCFC1R1
FAM83H	HDAC1
FAM84A	HEATR5B
FAM84B	HEBP1
FAM92A	HECTD1
FANCD2	HES1
FANCF	HEXB
FANCG	HGS
FANCI	HIC1
FANCL	HIC2
FANK1	HIST1H1C
FARP1	HIST1H4C
FARSA	HIST1H4H
FASN	HIST2H2BE
FAT4	HIVEP1
FAXDC2	HK2
FBLIM1	HLA-A
FBLN1	HLA-DRB4
FBLN2	HLA-E
FBLN5	HLA-F
FBN1	HLA-H
FBN2	HLX
FBXL16	HMG20B
FBXL5	HMGN1
FBXO17	HMGN4
FBXO25	HNRNPA3
FBXO32	HNRNPR
FBXO41	HNRNPUL1
FBXO45	HOOK2
FBXO46	HOXA5
FCER1A	HOXA6
FCGR2B	HOXA9
FDX1	HOXB2
FEN1	HOXB4
FERMT2	HOXB7
FEZ1	HOXC9
FEZ2	HPS3
FFAR4	HPS6
FGD3	HRC
FGF1	HSBP1
FGF13	HSD17B11
FGF14-AS2	HSP90B1
FGF2	HSPA12A
FGF7P3	HSPA1A
FGFBP2	HSPA1B
FGFR1	HSPA8
FGFR3	HSPB1
FGFR4	HSPB11
FGL2	HSPB8
FHDC1	HTRA1
FHL1	HUS1B
FIGN	HYI
FIGNL1	HYLS1
FILIP1	IBTK
FILIP1L	ICA1
FILNC1	ICAM3
FITM2	ICMT
FJX1	ID3
FKBP11	IDH1
FKBP4	IDH3A
FKBP5	IDH3B
FLI1	IDH3G
FLJ20021	IDNK
FLNB	IDS
FLVCR1	IDUA
FMC1	IER5
FMNL2	IFFO1
FMO1	IFI35
FMO2	IFITM1
FMO3	IFNAR1
FMOD	IFNAR2
FN1	IFRD1
FNBP1L	IFT122
FNBP4	IFT27
FNDC3B	IFT57
FNDC4	IGDCC4
FNIP2	IGF1
FOLR2	IGFBP2
FOS	IGFBP3
FOSB	IGFBP4
FOXA1	IGFBP5
FOXK2	IGFBP6
FOXM1	IGFLR1
FOXN2	IGSF11
FOXN3	IKBKG
FOXN3-AS1	IL10RB
FOXO1	IL13RA1
FOXO6	IL17D
FOXP1-IT1	IL27RA
FOXP2	IL33
FRAS1	ILF3
FREM1	INAFM1
FRG1BP	INF2
FRK	ING2
FRMD6-AS1	ING3
FRMD8	INO80D
FSTL1	INO80E
FTCDNL1	INPP4A
FTL	INPP4B
FTX	INPP5F
FUBP1	INSIG1
FUNDC2	IP6K1
FUS	IP6K3
FXYD1	IQCK
FXYD3	IRAK1
FYN	IRAK1BP1
FZD1	IRAK2
FZD2	IRAK3
FZD3	IRF2
FZD4	IRF2BP1
FZD5	IRF2BP2
FZD6	IRF2BPL
G0S2	IRS2
GAA	IRX2
GAB2	ISCA2
GABARAPL1	ISLR
GABBR1	ISYNA1
GABPB1-AS1	ITFG2
GAK	ITGA5
GALE	ITGAV
GALNT10	ITGB1
GALNT12	ITGB1BP1
GALNT15	ITGB4
GALNT16	ITGB5
GALNT3	ITIH5
GALNT6	ITM2A
GALNT7	ITM2B
GART	ITM2C
GAS1	ITPK1
GAS2L3	ITPRIPL2
GAS7	ITSN1
GATA2	IVNS1ABP
GATA3	JADE1
GATA3-AS1	JADE3
GATA6	JAK1
GATB	JAM2
GATD1	JAM3
GBAP1	JKAMP
GBE1	JMJD1C
GCAT	JMJD8
GCH1	JPH2
GCLC	JUND
GCLM	KANK2
GCNT2	KANK3
GCSH	KATNAL1
GDAP1	KATNB1
GDF10	KBTBD3
GDF15	KBTBD8
GDPD1	KCNJ8
GDPD5	KCNMA1
GEM	KCNMB1
GEN1	KCNN2
GFPT2	KCNT1
GGA3	KCTD12
GGCT	KCTD20
GGT6	KCTD21
GGTA1P	KCTD9
GHITM	KDELR3
GHR	KDM5B
GID4	KDSR
GIMAP1	KIAA0232
GIMAP6	KIAA0355
GIMAP7	KIAA0556
GIMAP8	KIAA1324L
GINM1	KIAA1328
GINS1	KIF1B
GINS2	KIF1BP
GIPC2	KIF20B
GJB2	KIF2A
GKAP1	KIF3B
GLDN	KLF8
GLI3	KLHDC3
GLRB	KLHL28
GLRX3	KLHL30
GLUD2	KLHL41
GLYAT	KLHL42
GLYATL2	KLHL5
GMDS	KLHL9
GMFG	KLKB1
GNAI1	KLRG1
GNAL	KMT5B
GNG11	KNSTRN
GNG12	KPNA3
GNG2	KRI1
GNPDA2	KRT10
GOLGA2P10	KTN1
GOLGA2P5	L2HGDH
GOLM1	LAMA5
GON4L	LAMP1
GORAB	LAMTOR5
GOT2	LAPTM4B
GPAM	LARP6
GPAT3	LASP1
GPAT4	LBH
GPATCH11	LDB3
GPATCH2L	LDOC1
GPC3	LEAP2
GPC6	LEMD2
GPD1	LEMD3
GPER1	LEP
GPHN	LEPROT
GPIHBP1	LETMD1
GPN3	LFNG
GPR146	LGALS3BP
GPR157	LGALS8
GPR160	LGALSL
GPR183	LGI1
GPR27	LGMN
GPR34	LHFP
GPRASP1	LHFPL2
GPRC5A	LHPP
GPSM2	LHX6
GPX1	LIG1
GPX3	LIMA1
GPX4	LIME1
GRAMD1A	LIN52
GRAMD1C	LINC00116
GRHL1	LINC00936
GRHL2	LINC00997
GRK3	LINC01089
GRK5	LIPE
GRP	LIPT1
GRTP1	LLGL1
GSDMD	LLPH
GSN	LMBR1
GSPT2	LMCD1
GSTM2	LMF2
GSTM5	LMNA
GSTO2	LMO3
GTDC1	LMO4
GTF2E2	LMO7
GTF3C1	LNPK
GTF3C4	LOC100288798
GULP1	LOC100652930
GYG2	LOC101928307
GYPC	LOC105377348
GYS2	LOC284023
H2AFX	LOC285147
H2AFY	LOC401052
H2BFS	LOC728554
HABP4	LOC81691
HACD1	LOC90768
HACD2	LONP2
HACL1	LONRF1
HADH	LOXL4
HAGHL	LPAR1
HAS1	LPCAT1
HAS2	LPCAT3
HBB	LPCAT4
HBD	LRCH4
HBP1	LRFN3
HCAR3	LRFN4
HCFC2	LRP10
HCP5	LRP12
HDAC1	LRP3
HDDC2	LRP4
HDGF	LRPPRC
HEATR5A	LRR1
HEBP2	LRRC14
HELLS	LRRC20
HERC6	LRRC75B
HES1	LRRC8B
HES4	LRRCC1
HES6	LRRFIP2
HGF	LSM1
HGS	LTBP3
HIBADH	LTBP4
HIBCH	LTBR
HID1	LUM
HIGD1B	LUZP1
HIKESHI	LXN
HINT2	LYL1
HINT3	LYRM4
HIP1R	LZTS2
HIST1H2AC	MACROD1
HIST1H2BC	MAGEE1
HIST1H2BD	MAL
HIST1H2BE	MALL
HIST1H2BH	MALSU1
HIST1H2BK	MAMDC2
HIST1H3E	MAMDC4
HIST1H4H	MAN1A1
HIST2H2BE	MAN1C1
HIST3H2A	MAN2A2
HJURP	MAN2B1
HK1	MAOA
HK2	MAP1A
HKR1	MAP1B
HLA-DQB2	MAP1S
HLA-F-AS1	MAP2K6
HLF	MAP3K11
HMG20B	MAP3K7
HMGA1	MAP3K7CL
HMGB3	MAP4K1
HMGN1	MAP4K4
HMMR	MAP6D1
HNMT	MAP7D1
HOGA1	MAPK10
HOMER1	MAPK3
HOMER3	MAPK7
HOOK1	MAPK8IP3
HOTAIR	MAPK9
HOTS	MAPKAPK5
HOXA10	MAPT
HOXA5	MARK1
HOXA7	MARK2
HOXB7	MAST3
HOXC10	MAT2A
HOXD8	MBOAT1
HOXD-AS2	MBOAT7
HP	MBP
HPGD	MCCC1
HPGDS	MCM3
HPN	MCM7
HPRT1	MCOLN1
HRASLS5	MCOLN3
HRCT1	MCRS1
HS6ST1	MCUB
HS6ST3	MDH1
HSD11B1	MDH2
HSD17B11	MDK
HSD17B7	MDP1
HSDL2	ME2
HSPA12A	MECOM
HSPA2	MED12
HSPB2	MED14
HSPB6	MED19
HSPB7	MED24
HSPB8	MED26
HSPBP1	MED30
HTR2B	MED9
HTRA4	MEIS3P1
HYOU1	MEOX1
ICAM2	MEPCE
ID1	METTL13
ID4	METTL17
IDH1	METTL21B
IDH2	METTL23
IDH3A	METTL4
IDNK	MFAP1
IER3	MFAP4
IFI6	MFN2
IFT122	MFNG
IGF1	MFSD10
IGF1R	MFSD14B
IGFBP2	MGAT1
IGFBP6	MGAT3
IGIP	MGAT4B
IGSF10	MGAT5
IGSF3	MGLL
IGSF9	MGP
IKBKB	MGRN1
IL11RA	MID1
IL17D	MIER1
IL17RB	MIR99AHG
IL1R1	MIS18BP1
IL33	MITD1
IL4I1	MKRN1
IL6	MKRN2
ILDR1	MLH1
ILF3	MLH3
IMMP2L	MLIP
INAVA	MLXIPL
ING5	MLYCD
INHBA	MMD
INMT	MMP23B
INPP4B	MMP28
INPP5J	MN1
INPP5K	MNT
INTS7	MOB3A
IPO4	MOB3B
IPO9	MOB4
IQCA1	MOCS1
IQCE	MOGS
IQCK	MOK
IQGAP3	MON1B
IRAK2	MOSPD2
IRAK3	MOSPD3
IRF1	MPC1
IRF2BP2	MPDU1
IRF3	MPHOSPH8
IRF6	MPLKIP
IRF7	MPPE1
IRF8	MPRIP
IRF9	MPST
IRS1	MPZL1
IRS2	MPZL2
IRX2	MRAP
IRX3	MRFAP1L1
IRX5	MRGPRF
ISCU	MRI1
ISG15	MRPL10
ISG20	MRPL11
ISG20L2	MRPL12
ISM1	MRPL15
ISYNA1	MRPL21
ITGA1	MRPL40
ITGA2	MRPL41
ITGA7	MRPL46
ITGA9	MRPL47
ITGAE	MRPL58
ITGB1BP1	MRPS22
ITGB2-AS1	MRPS24
ITGB4	MRPS33
ITGB8	MRPS6
ITIH5	MRPS7
ITM2A	MSL3
ITPK1	MSN
ITPR3	MSRA
ITSN1	MST1
JADE1	MSX1
JADE3	MTA1
JAG2	MTA2
JAK1	MTERF3
JAK3	MTHFS
JAM2	MTM1
JARID2	MTMR11
JAZF1	MTUS1
JHY	MUM1L1
JMJD4	MURC
JPH1	MVB12A
JPT1	MVD
JPT2	MVP
JRKL	MXD4
JUN	MXRA5
JUP	MXRA7
KANK1	MYADM
KANK2	MYBPH
KANK3	MYCT1
KANK4	MYH1
KANSL1-AS1	MYH10
KAT2A	MYH11
KAT2B	MYH3
KATNAL1	MYH7B
KBTBD11	MYH9
KCNAB1	MYL12A
KCNB1	MYL3
KCNE3	MYL6
KCNIP2	MYL9
KCNJ5	MYLK
KCNJ8	MYOC
KCNK1	MYOF
KCNK6	MYOM1
KCNS3	MYOM3
KCTD1	MYOT
KCTD12	MYOZ1
KCTD15	MZF1
KCTD5	N4BP1
KCTD9	N4BP2
KDELC2	NAA15
KDM2A	NAA25
KDM4B	NAAA
KDM5B	NAALAD2
KHDC4	NACAD
KIAA0319L	NADSYN1
KIAA0895	NAIF1
KIAA1107	NAP1L5
KIAA1211L	NAPRT
KIAA1324	NASP
KIAA1522	NAV2
KIAA1671	NBL1
KIF11	NBPF11
KIF15	NCK2
KIF18B	NCKAP5L
KIF20A	NCOA5
KIF22	NCOA7
KIF23	NCOR2
KIF26B	NCS1
KIF2C	NCSTN
KIF3A	NDEL1
KIF4A	NDFIP2
KIF5C	NDN
KIFC1	NDNF
KIFC2	NDRG1
KISS1R	NDRG3
KL	NDST1
KLB	NDST2
KLF11	NDUFA1
KLF15	NDUFA3
KLF2	NDUFA4
KLF3	NDUFA8
KLF4	NDUFA9
KLF6	NDUFAF4
KLF9	NDUFB1
KLHDC1	NDUFB11
KLHDC7B	NDUFB2
KLHDC8B	NDUFB3
KLHL13	NDUFB5
KLHL29	NDUFC1
KLHL31	NDUFS4
KLHL42	NDUFS7
KLHL5	NDUFS8
KLRG2	NDUFV1
KMT2B	NDUFV2
KMT2D	NECTIN2
KNL1	NECTIN3
KNOP1	NELFB
KNTC1	NET1
KPNA2	NEU1
KRAS	NEURL1
KRI1	NEXN
KRT15	NFIB
KRT18	NFYC
KRT19	NGB
KRT7	NGDN
KRT8	NINJ1
KRT80	NINJ2
KRTCAP3	NIPA2
L3HYPDH	NLGN2
LACC1	NME4
LACTB2	NMNAT3
LAD1	NMT2
LAGE3	NNT
LAIR1	NOD1
LAMA2	NOL10
LAMA4	NOL12
LAMA5	NOL3
LAMC1	NOTCH1
LAMP3	NOTCH3
LAPTM4B	NOV
LARP6	NOX4
LATS2	NPC2
LCLAT1	NPRL3
LCMT1	NR2C1
LCOR	NR2F2
LDB1	NR4A3
LDB2	NRBP2
LDHB	NSMAF
LDHD	NSMCE4A
LEF1	NSMF
LEP	NSUN4
LETMD1	NSUN5
LGALS1	NT5C3A
LGALS12	NT5C3B
LGALS3	NT5DC1
LGMN	NT5DC2
LHCGR	NTAN1
LHFPL6	NTMT1
LHX4-AS1	NTN1
LIFR	NTN4
LIG1	NTPCR
LIG3	NTRK2
LILRB5	NUCB1
LIMA1	NUDT16
LIMCH1	NUDT18
LIMK2	NUDT2
LIN7A	NUDT3
LINC00173	NUDT5
LINC00310	NUMB
LINC00312	NUP160
LINC00537	NUP214
LINC00665	NUP85
LINC00667	NUPR1
LINC00888	OAF
LINC00968	OAT
LINC00993	ODF2
LINC01000	ODF2L
LINC01004	ODF3L2
LINC01138	OGDH
LINC01140	OLFML1
LINC01279	OLFML2A
LINC01341	OLFML2B
LINC01355	OLFML3
LINC01410	OPTN
LINC01697	OR11L1
LINC02076	ORAOV1
LINC02381	ORC5
LINC-PINT	ORMDL1
LIPE	OS9
LIPE-AS1	OSBP
LIX1L	OSBPL5
LLGL2	OSTC
LLPH	OSTF1
LMBRD1	OSTM1
LMLN	OXA1L
LMNB1	OXCT1
LMNB2	OXLD1
LMO2	P2RY11
LMO3	P3H1
LMO7	P3H4
LMOD1	P4HA2
LMTK2	PABPC1
LNPEP	PABPN1
LOC100049716	PACS1
LOC100129917	PALM
LOC100130987	PAMR1
LOC100190986	PANK1
LOC100286925	PANK2
LOC100288911	PAQR7
LOC100289361	PARK7
LOC100505938	PARM1
LOC100506368	PARP11
LOC100506388	PARP4
LOC100506476	PARVB
LOC100507557	PBX1
LOC101060391	PBX3
LOC101926959	PCBD2
LOC101926960	PCBP2
LOC101927752	PCDH12
LOC101928111	PCDH19
LOC101929398	PCGF2
LOC101930114	PCM1
LOC102723493	PCNP
LOC102724851	PCNT
LOC105379426	PCNX3
LOC114224	PCSK5
LOC285095	PCYOX1
LOC285097	PDCD10
LOC388692	PDCD2
LOC643733	PDCD2L
LOC728730	PDCD6
LOC729732	PDCD6IP
LOC729970	PDCD7
LONRF1	PDCL
LOXL1-AS1	PDDC1
LOXL4	PDE4B
LPAR1	PDE5A
LPAR2	PDE7B
LPAR6	PDE8A
LPCAT1	PDE8B
LPIN1	PDE9A
LPL	PDGFRA
LPP-AS2	PDGFRB
LRBA	PDGFRL
LRFN5	PDHA1
LRG1	PDHB
LRIG2	PDIA5
LRMDA	PDK1
LRP1	PDK2
LRP1B	PDK3
LRP2	PDLIM1
LRRC1	PDLIM5
LRRC15	PDXDC2P
LRRC34	PEA15
LRRC59	PECAM1
LRRC8E	PECR
LRRN1	PEG3
LRRN3	PELI1
LRRN4CL	PELI2
LSG1	PEMT
LSM6	PEX14
LSR	PEX19
LTF	PEX2
LUC7L	PFKL
LUC7L3	PFKP
LVRN	PFN1
LY6E	PGAM1
LY96	PGAP3
LYPD3	PGLS
LYPD6B	PGM5
LYRM1	PGRMC1
LYRM7	PHACTR4
LYVE1	PHC1
LZTS1	PHC2
MACROD2	PHF11
MAD2L1	PHF13
MAF	PHF19
MAFF	PHF20L1
MAGED1	PHF3
MAGED2	PHF5A
MAGEF1	PHGDH
MAGI2-AS3	PHLDB1
MAGI3	PHLPP1
MAL2	PHOSPHO2
MAMDC2	PHYKPL
MAML2	PI16
MAN1A1	PIAS1
MAN1B1	PICALM
MAN1C1	PIEZO1
MANEA	PIGA
MANEAL	PIGC
MAOA	PIGP
MAOB	PIGQ
MAP1B	PIGT
MAP1LC3B	PIK3IP1
MAP1LC3C	PIP4K2A
MAP2K1	PITPNB
MAP3K20	PITPNC1
MAP3K21	PJA1
MAP3K5	PKD1
MAP3K8	PKD2
MAP3K9	PKN1
MAP7	PKP2
MAP7D1	PKP4
MAP7D3	PLA2G16
MAPK10	PLA2G4C
MAPK13	PLAC9
MAPKAPK2	PLAGL1
MARCKSL1	PLCB4
MARCO	PLCD4
MARK1	PLCG1
MARVELD2	PLCG2
MARVELD3	PLCL2
MATN2	PLEKHA1
MATR3	PLEKHA3
MAZ	PLEKHA4
MB	PLEKHF1
MBD2	PLEKHO2
MBD6	PLIN1
MBIP	PLIN3
MBNL1	PLOD2
MBNL1-AS1	PLOD3
MBNL2	PLPP1
MBNL3	PLRG1
MBOAT1	PLS3
MBOAT2	PLSCR3
MBOAT7	PLSCR4
MCAM	PLTP
MCCC1	PLVAP
MCF2L	PLXDC2
MCM2	PLXNA3
MCM4	PMEPA1
MCM5	PMM1
MCM7	PMP22
MCTP1	PMPCB
MDC1	PNMA1
MDFIC	PNPLA2
MDH1	PNRC2
MDK	PODN
MDM4	POFUT2
ME1	POGK
ME3	POGLUT1
MECR	POLB
MED1	POLD4
MED11	POLE4
MED16	POLG
MEGF10	POLR1D
MEIS2	POLR2H
MELK	POLR2L
MELTF	POMC
MEN1	POMT2
MEOX1	PON2
MEOX2	POP7
MESP1	POPDC2
MEST	PORCN
METRN	PPA1
METTL1	PPARGC1A
METTL5	PPCS
METTL7A	PPFIA1
MEX3A	PPFIBP2
MFAP2	PPIH
MFAP4	PPIL3
MFAP5	PPM1B
MFSD10	PPM1M
MFSD6	PPOX
MGAT4A	PPP1R18
MGAT4B	PPP1R1B
MGLL	PPP1R21
MGME1	PPP1R35
MGST1	PPP1R3F
MGST3	PPP1R7
MIAT	PPP1R8
MICAL1	PPP2R2B
MICAL2	PPP2R3A
MICALL1	PPP2R5A
MICALL2	PPP2R5B
MICB	PPP3CC
MICU3	PPP3R1
MID1	PPP6R2
MID2	PPT1
MIDN	PPTC7
MIF	PQLC1
MIF-AS1	PRDM4
MIR100HG	PRELID1
MIR181A2HG	PRELID3B
MIR3682	PRKAA1
MIR570HG	PRKAB2
MISP	PRKAG2
MITF	PRKCDBP
MKI67	PRKCE
MKX	PRKX
MLLT11	PRMT2
MLLT6	PRMT6
MLPH	PRNP
MLXIPL	PROS1
MLYCD	PROX1
MMD	PRPH
MME	PRPSAP1
MMEL1	PRR13
MMGT1	PRR14
MMP1	PRR16
MMP11	PRR5
MMP13	PRRC2C
MMP28	PRRG1
MMP3	PRSS23
MMP9	PSME4
MMRN2	PSMG2
MOB3B	PTCH1
MOB3C	PTEN
MOCS1	PTGFRN
MOGS	PTGIS
MORC2	PTGR1
MOV10	PTK2
MPC1	PTMS
MPDZ	PTP4A3
MPEG1	PTPA
MPP1	PTPN2
MPP6	PTPN3
MPPED2	PTPRA
MPZL2	PTPRB
MRAP	PTPRE
MRAS	PTPRF
MRC1	PTPRK
MREG	PTRF
MRGPRF	PTTG1IP
MRPL2	PTTG2
MRPL46	PUDP
MRPS36	PUM3
MS4A4A	PURA
MS4A6A	PWP1
MSANTD4	PWWP2B
MSC-AS1	PXDN
MSI2	PXMP4
MSRA	PXYLP1
MSRB3	PYGM
MST1R	RAB11FIP1
MSX1	RAB11FIP2
MT1HL1	RAB11FIP5
MT1M	RAB13
MT1X	RAB23
MTA1	RAB28
MTCL1	RAB2B
MTFP1	RAB31
MTFR1L	RAB32
MTFR2	RAB34
MTG1	RAB35
MTHFD1	RAB3IL1
MTHFD2	RAB40C
MTIF3	RAB43
MTMR10	RAB4B
MTURN	RAB5C
MUC1	RAB7B
MUC20	RAB8A
MX1	RABAC1
MXRA5	RABL2B
MXRA7	RAC1
MXRA8	RAD23A
MYB	RAE1
MYBL1	RAI14
MYBL2	RAI2
MYCBP2	RALB
MYCT1	RAMP1
MYEF2	RANBP1
MYEOV	RAP1GDS1
MYH1	RAPGEF1
MYH9	RAPGEF6
MYL5	RAPGEFL1
MYL9	RAPH1
MYMX	RAPSN
MYO10	RARA
MYO19	RARRES2
MYO1C	RARS2
MYO1D	RASA3
MYO5B	RASA4
MYO5C	RASAL2
MYO6	RASAL3
MYOC	RASD2
MYOM1	RASGRP3
MYRIP	RASIP1
MZF1	RASL10B
N4BP2L2	RASSF5
NAA25	RASSF7
NAA40	RAVER1
NAB1	RAVER2
NABP1	RBAK
NADSYN1	RBBP5
NAIP	RBBP6
NANS	RBBP9
NAP1L5	RBFA
NAPB	RBM10
NAPEPLD	RBM14
NAPSB	RBM15
NAT1	RBM20
NAT10	RBM24
NAT14	RBM42
NAT8L	RBM43
NATD1	RBM48
NAV2	RBMS1
NAV3	RBMS3
NBEAL2	RBPJ
NBPF4	RBPMS
NCAPD2	RBPMS2
NCAPG	RCAN1
NCF2	RCC1
NCF4	RCC2
NCOA3	RCE1
NCOA4	RCN3
NCOA5	RCOR3
NDC1	RDH11
NDC80	RECK
NDN	REEP1
NDNF	RENBP
NDRG2	RERG
NDUFA12	REV1
NDUFAF1	RFC1
NDUFAF3	RFC4
NDUFAF4	RFC5
NDUFAF6	RFESD
NDUFB5	RFTN1
NDUFS1	RFWD2
NDUFS4	RFX1
NDUFV3	RFX5
NEBL	RGS10
NECAB3	RGS11
NECTIN2	RGS14
NECTIN3	RGS5
NECTIN4	RHOA
NEGR1	RHOB
NEK2	RHOC
NEK5	RIDA
NEK7	RIPK1
NEMP1	RIPK2
NETO2	RMI2
NEURL1B	RNASE4
NEXN	RNASEH1
NFIA	RNASEL
NFIL3	RNF123
NFKBIE	RNF135
NFU1	RNF14
NGEF	RNF141
NHLRC2	RNF145
NHLRC3	RNF146
NID1	RNF150
NID2	RNF157
NINJ2	RNF19B
NINL	RNF217
NIPAL3	RNF34
NIPSNAP1	RNF38
NIPSNAP3A	RNF44
NIPSNAP3B	RNH1
NKAPL	RNLS
NKIRAS1	RNPC3
NLGN1	RNU11
NLN	ROMO1
NLRC5	RORA
NLRP3	RPAP3
NMB	RPE
NME1	RPH3AL
NME3	RPIA
NMRAL1	RPL13A
NMRK1	RPL15
NMT2	RPL17
NNAT	RPL32
NNT	RPL34
NNT-AS1	RPL35A
NOD2	RPL41
NOL4L	RPL9
NOP2	RPP25L
NOV	RPPH1
NOVA1	RPRML
NOXA1	RPS12
NPAS2	RPS15A
NPDC1	RPS17
NPIPA1	RPS23
NPNT	RPS24
NPR1	RPS26
NPR2	RPS26P11
NPR3	RPS29
NPTN-IT1	RPS6KA4
NPY1R	RPS6KA6
NPY5R	RPS9
NQO1	RPUSD1
NQO2	RPUSD3
NR1H3	RRAGB
NR2C2AP	RRAGC
NR2F1-AS1	RRAGD
NR2F6	RRAS
NR3C1	RRBP1
NR3C2	RRP12
NR4A1	RRS1
NR4A3	RSBN1
NRARP	RSPRY1
NRBF2	RSRP1
NREP	RTKN
NRIP3	RTN1
NRN1	RTN2
NRP1	RTN3
NRP2	RUFY1
NSA2	RUNX1
NSD2	RUNX1T1
NSF	RUNX3
NSUN5P1	RUSC1
NSUN6	RWDD2A
NSUN7	RXRA
NT5E	RXRG
NTM	RYBP
NTRK2	RYR1
NUBPL	RYR3
NUDT16L1	S100A10
NUDT6	S100A11
NUDT7	S100A13
NUF2	S100A4
NUMA1	S100A6
NUP210	SAC3D1
NUP62	SALL2
NUSAP1	SAMD1
NUTM2B-AS1	SAMD4B
NVL	SAP30BP
OAF	SAR1A
OAS3	SARM1
OBSL1	SAT1
[truncated: 1,251 more rows]
